# Supplementary material for: Spatial Contrast Sensitivity to Polarization and Luminance in Octopus
Source: Front Physiol. 2020 Apr 28;11:379. doi: 10.3389/fphys.2020.00379 (PMC7212343; doi:10.3389/fphys.2020.00379)
Supplement: Supplementary file 2 [file Data_Sheet_1.xlsx]

## Sheet: OctosSummary.csv
Contrast Threshold
	Polarisation
	Tseebii	Atocatl	Xhono	Sha'keton	Tekyu	Ahtapot	Tuktujk
Frequency	Threshold	Threshold	Threshold	Threshold	Threshold	Threshold	Threshold
4	31.6249	15.6644	28.8384	27.9055	18.8668	5.97635	9.85772
1	3.22646	3.25163	20.924	24.118	3.6906	2.16974	8.70826
0.3	1.32999	1.14512	2.11264	4.06932	1.44259	1.44988	2.34181
0.1	1.96246	6.02774	7.2981	15.4312	2.48684	1.86509	2.79985
	Luminance
	Atha	Tmienja	Wassakib	Tekyu	Ahtapot	Tuktujk
Frequency	Threshold	Threshold	Threshold	Threshold	Threshold	Threshold
12	16.9273
4	11.7164	9.5234	9.36656	14.1834	10.0153	13.8726
1	3.35307	8.75868	4.97713	4.45591	3.08024	4.24558
0.3	1.72792	5.87186	4.50007	3.21267	1.78978	2.82284
0.1	2.60466	8.44434	5.27751	5.2653	4.28293	4.38826
Sensitivity (1/Ct)
	Polarisation
	Tseebii		Atocatl		Xhono		Sha'keton		Tekyu		Ahtapot		Tuktujk
Frequency	Threshold	Q1 - Q3	Threshold	Q1 - Q3	Threshold	Q1 - Q3	Threshold	Q1 - Q3	Threshold	Q1 - Q3	Threshold	Q1 - Q3	Threshold	Q1 - Q3
12	1.75297	1.618 - 1.881	4.10261	3.739 - 4.45	1.42932	0.354 - 1.584	1.23744	1.064 - 1.361
4	3.16207	2.849 - 3.471	6.38389	5.737 - 7.06	3.46759	3.169 - 3.776	3.58352	3.26 - 3.918	5.30031	4.819 - 5.709	16.7326	15.237 - 18.404	10.1443	9.076 - 11.091
1	30.9938	28.827 - 33.435	30.7538	27.641 - 34.029	4.77919	4.435 - 5.133	4.14629	3.795 - 4.544	27.0959	24.787 - 29.415	46.0885	41.571 - 50.943	11.4834	10.34 - 12.59
0.3	75.1884	69.412 - 81.102	87.3274	82.298 - 92.612	47.3342	43.04 - 52.254	24.5741	22.701 - 26.552	69.32	64.211 - 80.511	68.971	63.734 - 78.309	42.702	40.153 - 48.584
0.1	50.9564	45.918 - 56.502	16.59	15.088 - 18.167	13.7022	12.662 - 14.905	6.48037	5.95 - 7.116	40.2117	36.04 - 44.313	53.6168	48.361 - 59.123	35.7162	32.301 - 39.196
	Luminance
	Atha		Tmienja		Wassakib		Tekyu		Ahtapot		Tuktujk
Frequency	Threshold	Q1 - Q3	Threshold	Q1 - Q3	Threshold	Q1 - Q3	Threshold	Q1 - Q3	Threshold	Q1 - Q3	Threshold	Q1 - Q3
12	5.90762	4.676 - 6.408	9.01642	7.979 - 10.071	8.46049	7.604 - 9.299
4	8.53507	7.655 - 9.354	10.5005	9.295 - 11.321	10.6763	9.869 - 11.622	7.05048	5.451 - 8.121	9.98473	9.054 - 10.986	7.20847	6.043 - 8.179
1	29.8234	27.195 - 32.443	11.4172	10.285 - 12.653	20.0919	18.661 - 21.562	22.4421	20.064 - 24.657	32.465	29.797 - 35.537	23.5539	20.922 - 26.055
0.3	57.8729	51.162 - 64.029	17.0304	15.481 - 18.976	22.2219	20.274 - 24.734	31.1268	27.577 - 35.116	55.8727	51.526 - 61.429	35.4254	32.142 - 39.032
0.1	38.3927	34.237 - 45.23	11.8422	10.696 - 12.973	18.9483	17.707 - 20.327	18.9923	17.238 - 20.986	23.3485	21.364 - 25.686	22.7881	20.386 - 25.133
0.05	37.0799	33.13 - 41.824	9.54227	8.726 - 10.399	12.8796	11.827 - 14.214
